# Supplementary material for: Global Mental Health and Services for Migrants in Primary Care Settings in High-Income Countries: A Scoping Review
Source: MDPI journal article supplement (doi:10.3390/ijerph17228627), 2020-11-20
Supplement: s1 [file s1]

## **Search Strategy for MEDLINE**

1. Refugees/
2. refugee\*.mp.
3. (Displaced adj2 (person\* or people\* or population\*)).mp.
4. (asylum adj2 seek\*).mp.
5. Undocumented Immigrants/
6. ((undocumented or illegal or irregular) adj2 (immigrant\* or migrant\* or worker)).mp.
7. 1 or 2 or 3 or 4 or 5 or 6
8. Primary Health Care/
9. primary health care.mp.
10. primary healthcare.mp.
11. primary care.mp.
12. primary medical care.mp.
13. Community Health Services/
14. (community adj2 (care or health or healthcare or service\*)).mp.
15. Physicians, Family/
16. Family physician\*.mp.
17. Family doctor\*.mp.
18. General Practitioners/
19. General practitioner\*.mp.
20. GPs.mp.
21. GP.mp.
22. Nurse Practitioners/
23. Nurse practitioner\*.mp.
24. Patient Care Team/
25. Family health team\*.mp.
26. Shared care model\*.mp.
27. 8 or 9 or 10 or 11 or 12 or 13 or 14 or 15 or 16 or 17 or 18 or 19 or 20 or 21 or 22 or 23 or 24 or 25 or 26

28. Mental Health/
29. mental health.mp.
30. exp Mental Disorders/
31. mental disorder\*.mp.
32. psychiatric disease\*.mp.
33. psychiatric disorder\*.mp.
34. psychiatric illness\*.mp.
35. Stress Disorders, Post-Traumatic/
36. ptsd.mp.
37. post-traumatic stress disorder.mp.
38. posttraumatic stress disorder.mp.
39. mental illness\*.mp.
40. Anxiety Disorders/
41. anxiety.mp.
42. anxiety disorder\*.mp.
43. Depressive Disorder, Major/
44. depression.mp.
45. 28 or 29 or 30 or 31 or 32 or 33 or 34 or 35 or 36 or 37 or 38 or 39 or 40 or 41 or 42 or 43 or 44
46. 7 and 27 and 45
47. limit 46 to yr="2000 -Current"
